# Supplementary material for: Acceptability, Tolerability, and Estimates of Putative Treatment Effects of Probiotics as Adjunctive Treatment in Patients With Depression: A Randomized Clinical Trial
Source: PubMed Central journal article supplement (PMC10267847; doi:10.1001/jamapsychiatry.2023.1817), 2023-06-14
Supplement: jamapsychiatry-e231817-s003.pdf [file jamapsychiatry-e231817-s003.pdf]

## Data Sharing Statement

Nikolova. Acceptability, Tolerability, and Estimates of Putative Treatment Effects of Probiotics as Adjunctive Treatment in Patients With Depression. *JAMA Psychiatry*. Published June 14, 2023. doi:10.1001/jamapsychiatry.2023.1817

### Data

**Data available:** Yes

**Data types:** Deidentified participant data, Data dictionary

**How to access data:** Data will be made available upon reasonable request, please email [j.stone@bsms.ac.uk](mailto:j.stone@bsms.ac.uk).

**When available:** With publication

### Supporting Documents

**Document types:** None

### Additional Information

**Who can access the data:** researchers whose proposed use of the data has been approved

**Types of analyses:** Specified approved purposes

**Mechanisms of data availability:** with a signed data access agreement
